# Supplementary material for: Characterization of the Role of SPL9 in Drought Stress Tolerance in Medicago sativa
Source: MDPI journal article supplement (doi:10.3390/ijms21176003), 2020-08-20
Supplement: s1 [file s1]

**Table S1.** Primer specifications and how they were utilized in relation to this study.

| Primer Name   | Primer Sequence                  | Primer Use                                                  |
|---------------|----------------------------------|-------------------------------------------------------------|
| SPL9RNAi_F    | CACCCTCTCTCTTCTGTCAAATCAAACATGGG | SPL9-RNAi construct cloning                                 |
| SPL9RNAi_R    | TTACAGTGACCATTGAGAAGATTCATAGG    | SPL9-RNAi construct cloning                                 |
| npII-F        | GAGGCTATTCGGCTATGACTG            | Forward primer for <i>SPL9</i> -RNAi transgene confirmation |
| npII-R        | ATCGGGAGCGGCGATACCGTA            | Reverse primer for <i>SPL9</i> -RNAi transgene confirmation |
| LA-MsSPL9-Fq1 | AGATACAGCTCTTGCTACTG             | Forward primer of <i>MsSPL9</i> for qPCR                    |
| LA-MsSPL9-Rq1 | GTTGAGAATGTTGAACTGAC             | Reverse primer of <i>MsSPL9</i> for qPCR                    |
| DFR-F         | GTTTGTGTCACAGGGGCTTC             | Forward primer of <i>MtDFR</i> for qPCR                     |
| DFR-R         | TTCAAGTTTTCTGGGTCGCG             | Reverse primer of <i>MtDFR</i> for qPCR                     |
| Cat1-F        | GAAAAGCTTGCCCAATTTGA             | Forward primer of <i>MtCAT1</i> for qPCR                    |
| Cat1-R        | ATGACGGGTGTCTGAACTCC             | Reverse primer of <i>MtCAT1</i> for qPCR                    |
| GSH-F         | ACGCTTCCCAGCTTTAATGA             | Forward primer of <i>MtGSH</i> for qPCR                     |
| GSH-R         | CCCCAACAAGAAGACCATTG             | Reverse primer of <i>MtGSH</i> for qPCR                     |
| ms_ADF1qF     | TCAAGGCGAAAAGGACACAC             | Forward primer of <i>MsADF</i> for qPCR (reference gene)    |
| ms_ADF1qR     | AAAACAGCATAGCGGCACTC             | Reverse primer of <i>MsADF</i> for qPCR (reference gene)    |
| ms_eIF4AqF    | TGCTAAGTTGCCTGAAACCG             | Forward primer of <i>MseIF4A</i> for qPCR (reference gene)  |
| ms_eIF4AqR    | TGCCCATGTTTTCACCTTGC             | Reverse primer of <i>MseIF4A</i> for qPCR (reference gene)  |
