# Supplementary material for: Characterization of the Role of SPL9 in Drought Stress Tolerance in Medicago sativa
Source: MDPI journal article supplement (doi:10.3390/ijms21176003), 2020-08-20
Supplement: s1 [file s1]

**A.**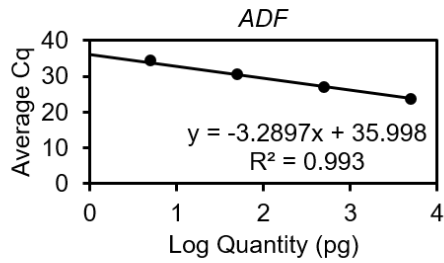**B.**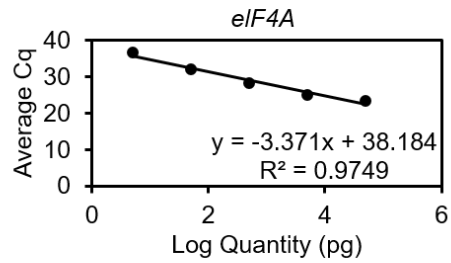**C.**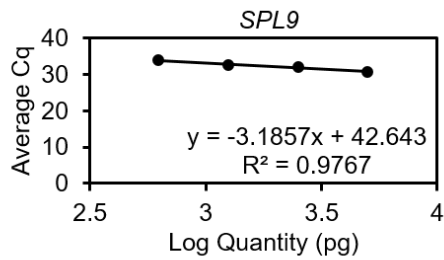**D.**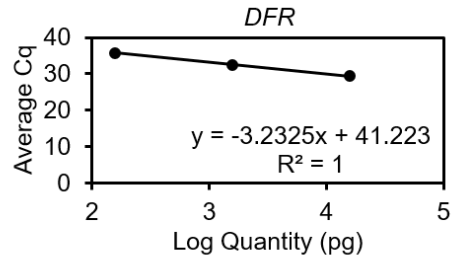**E.**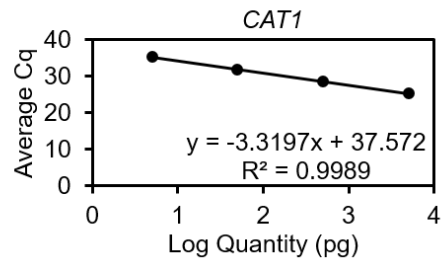**F.**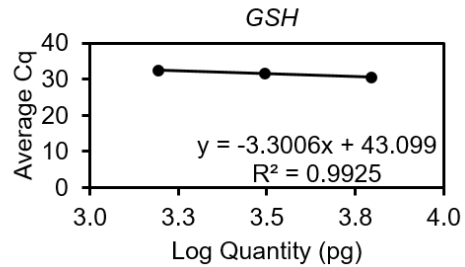

**Figure S2:** qRT-PCR standard curves. Standard curves for each primer pair used in qRT-PCR. Resulting equations were used to determine dynamic range and efficiency values.
