# Supplementary material for: Characterization of the Role of SPL9 in Drought Stress Tolerance in Medicago sativa
Source: MDPI journal article supplement (doi:10.3390/ijms21176003), 2020-08-20
Supplement: s1 [file s1]

ATACGCTGCACTGCATCACTGCACTGAACTGGGTTCTTGCCAACAATACATAT  
 GGCCCAGCAGTGTCAACTCACTTCTTCCTTCCACCTCTTCTCTTTTGTCTTC  
 CACTTCACTTTTCCACTATCATTCACTCTCTTCTTTTTTTAATGTTTTCACTT  
 TAACCAACAATAACAACCACCACTCCCCAGACCCCCCTCACCTATACTATTCT  
 CTCACTCTTACACTCACACTTCACTTCACTTCACTTATCTCTCACCAATGAAC  
 ACAATCTAGCAACCACCACCAAACCTCACACCA**ATGGATTCAAGGAGGCAACTC**  
**TTCTTCGGAAGAGTCCTCTCTTAATGGCTTAAAATTTGGCCAACGAATCTATT**  
**TTGAAGATACAGCTCTTGCTACTGCTGCTGCTGCTACTTCTACCACCATTGCT**  
**GCTAGTTCTTCTTCTTCTTCTGGTTCAAAGAAAGGAAGAGGTGGGTCAAGTTCA**  
**ACATTCTCAACCACCTCGGTGTCAAGTTGAAGGATGTAAACTAGATCTGACTG**  
**ATGCTAAAGCTTACTATTCTAGACACAAAGTTTGTAGCATGCACTCTAAGTGC**  
**CCAAGTGTACTGTTTCTGGTCTACAACAAAGGTTTGTCAACAATGTAGCAG**  
**ATTTTCATCAGCTTGCTGAGTTTGATCAAGGAAAAAGAAGTTGCCGGAGACGAC**  
**TAGCTGGTCATAACGAGCGTCGCAGAAAGCCCCCA****CCCAGCTCTCTCTTAACC**  
 TCACGTTTTTCCAGGCTTTCTTCATCTGTTTTTGGTAACAGTGACAGAGGTGG  
 CAGCTTCTTGATGGAATTTGCTTCAAACCCAAAACCTTAGTCTGAGAAATTCAC  
 TTCCACCACCCGGAATCAGACCACAACAATCGGTTGGCCTTGGCCGGGGAAC  
 ACGGAGTCGCCATCTGACAACCTTTTCTTGCAAGGTTTCGGTGGGTGGGACAAG  
 CTTCCCTGGTGCCAGGCATCTCCCGAGGAACTTACACCGGAGTCACAGATT  
 CAAACTG**TGCTCTCTCTCTCTGTCAAATCAAACATGGGGTTCTCGAAACACA**  
 GAACCAAGTCCTGAATTGAATAACATGCTGAATTTCAATGGGACATCCATGAC  
 ACAACATGCTACATCTTCTCATGGTGTAGCCATGCATCAAATTCCAAACAATT  
 ACGAGGTTGTCCCTGATCTTGGTCGGGGTCACATTTTCGCAGCCTCTTGGTAGC  
 CAACTCTCTGGTGAGCTTGATCTGTGCGCAGCAGGGAAGGAGGCATTATATGGA  
**TGTAGAACATTCCAGGGCCTATGAATCTTCTCAATGGTCACTGTAA**TGCACTT  
 GTTTGCTTTTCAGGTTTGTAATAACATGTTTCACAAATATTTGAACTCAGGAAA  
 GTGAGAAGTGAACCTAAGGCATACTTGATGCTCTTGCTTGTTTTGGTTTTGTTTA  
 AACTGTTAGGCAAGGTGGGGCTAGCCTTGCTTCACTTTGTGGTTTTGTAATCTC  
 TTCCTAGTTATTTGAGATTATCATGGTTTTCAAATTTTCAGGAAGTTGTTTTGATG  
 TGGATTTGGTTGCACCTTTGTAGCATTGTGATTGTGAAAATTGCAAATAAATG  
 TTGCAATAGCGGCTTGAATCAATTTTATGTTTGCATTGAATGAT

**Figure S3:** *SPL9*-RNAi construct target location in *MsSPL9* coding sequence. Full length *Medicago sativa* *SPL9* cDNA [28] used as reference in the design of the *SPL9*-RNAi construct. To target *MsSPL9*, the 300 bp fragment (primers bolded) used in the RNAi construct was designed within the protein coding sequence (highlighted in yellow) but outside the conserved SBP domain (underlined). The region complimentary to miR156 is shown with red text.
