# Supplementary material for: Characterization of the Role of SPL9 in Drought Stress Tolerance in Medicago sativa
Source: MDPI journal article supplement (doi:10.3390/ijms21176003), 2020-08-20
Supplement: s1 [file s1]

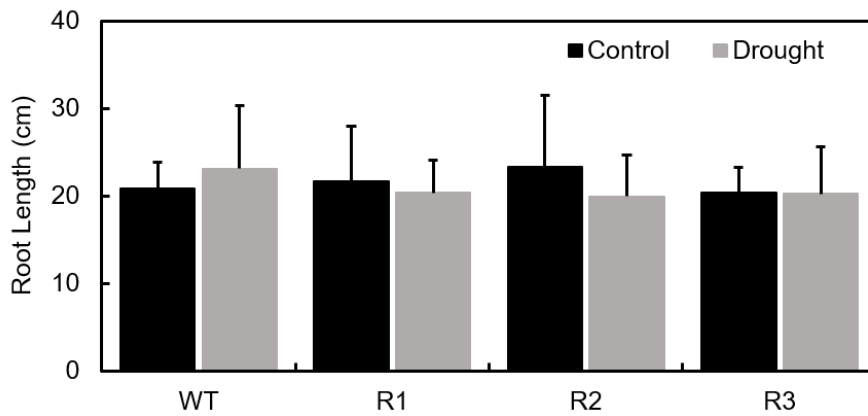

**Figure S1:** *SPL9*-RNAi root length in response to drought. Root length of plants grown in containers after 12 days of control and drought conditions. Asterisks indicate significant differences between treatments ( $P < 0.05$ , where  $n = 9-10$ , Two-Way ANOVA, Sidak test).
